# Supplementary material for: Paper‐and‐Pencil vs. Electronic Patient Records: Analyzing Time Efficiency, Personnel Requirements, and Usability Impacts on Healthcare Administration
Source: Preprints.org preprint supplement (doi:10.20944/preprints202409.1883.v1), 2024-09-24
Supplement: Supplementary file 1 [file supplementary]

# Supplementary Material

Table S2: Comparison of data entry modalities in the whole sample and in the subsample of first visits (sensitivity analysis)

|  | Whole sample | | | | |  | Only first visit | | | | |
| --- | --- | --- | --- | --- | --- | --- | --- | --- | --- | --- | --- |
|  | P & P | | Electronic | |  |  | P & P | | Electronic | |  |
|  | N | Median (IQR) | N | Median (IQR) | p |  | N | Median (IQR) | N | Median (IQR) | p |
| Overall ward round time | 191 | 649 (189, 1186) | 160 | 637 (214, 1132) | 0.799 |  | 62 | 326 (109, 1200) | 52 | 371 (138, 1163) | 0.539 |
| Preparatory time before visit | 187 | 0.07 (0.04, 0.20) | 147 | 0.07 (0.02, 0.22) | 0.470 |  | 59 | 0.10 (0.05, 0.28) | 48 | 0.07 (0.03, 0.28) | 0.312 |
| Documentation time inside patient room (psysicians) | 121 | 0.14 (0.06, 0.24) | 133 | 0.19 (0.12, 0.29) | < 0.001 |  | 36 | 0.16 (0.10, 0.26) | 45 | 0.19 (0.14, 0.29) | 0.262 |
| Documentation time inside patient room (nurses) | 132 | 0.13 (0.08, 0.18) | 105 | 0.10 (0.06, 0.13) | < 0.001 |  | 29 | 0.12 (0.08, 0.18) | 27 | 0.12 (0.07, 0.13) | 0.282 |
| Interaction time with patients | 190 | 0.34 (0.25, 0.46) | 153 | 0.33 (0.27, 0.42) | 0.575 |  | 62 | 0.41 (0.27, 0.64) | 49 | 0.37 (0.29, 0.46) | 0.288 |
| Time for applying bandages | 114 | 0.44 (0.35, 0.52) | 94 | 0.43 (0.34, 0.49) | 0.674 |  | 25 | 0.43 (0.35, 0.48) | 25 | 0.42 (0.38, 0.47) | 0.939 |


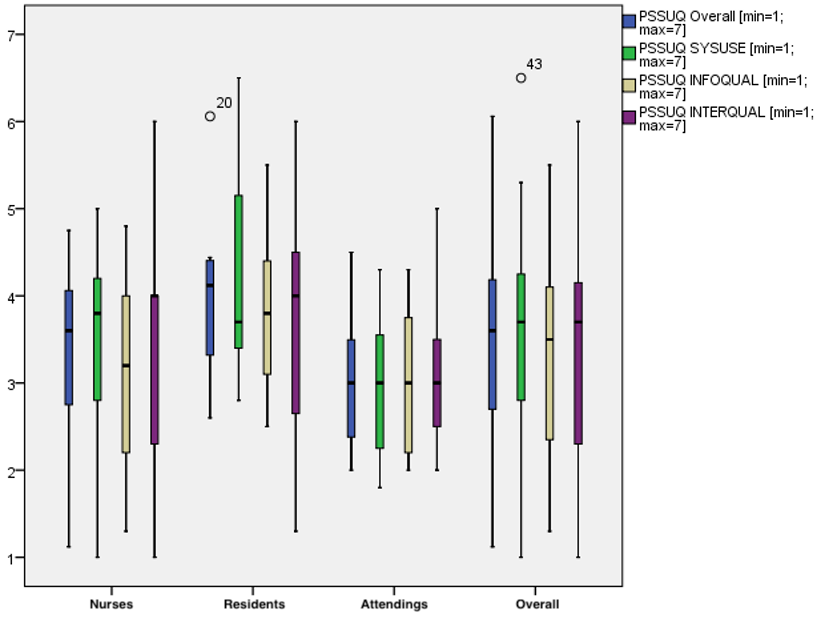


Figure S5: Detailed Chart View Across Professions for PSSUQ

Table S3: System Usability Scale (SUS)

| Nr. | SUS | ++ | + | 0 | - | - - |
| --- | --- | --- | --- | --- | --- | --- |
| 1 | | I can imagine using the system regularly. | | --- |  |  | | --- | |  |  |  |  |  |
| 2 | I find the system unnecessarily complex. |  |  |  |  |  |
| 3 | I find the system easy to use. |  |  |  |  |  |
| 4 | I think I need support from technical personnel to use the system. |  |  |  |  |  |
| 5 | I find that the various functions of the system were well integrated. |  |  |  |  |  |
| 6 | I find that there are too many inconsistencies in the system. |  |  |  |  |  |
| 7 | I can imagine that most people would learn to use the system quickly. |  |  |  |  |  |
| 8 | I find the system's operation extremely cumbersome. |  |  |  |  |  |
| 9 | I felt very confident using the system. |  |  |  |  |  |
| 10 | I had to learn a lot before I could use the system effectively. |  |  |  |  |  |

Table S4: Post-Study System Usability Questionnaire (PSSUQ)

| **Nr.** | **PSSUQ** | **+++** | **++** | **+** | **0** | **-** | **-**  **-** | **-**  **-**  **-** | **n/a** |
| --- | --- | --- | --- | --- | --- | --- | --- | --- | --- |
| 1 | Overall, I am satisfied with how easy it is to use this system. |  |  |  |  |  |  |  |  |
| 2 | The system’s operation was intuitive. |  |  |  |  |  |  |  |  |
| 3 | I was able to complete the tasks quickly using the system. |  |  |  |  |  |  |  |  |
| 4 | I found the system’s operation pleasant. |  |  |  |  |  |  |  |  |
| 5 | The system was easy to learn. |  |  |  |  |  |  |  |  |
| 6 | I believe I became productive quickly using the system. |  |  |  |  |  |  |  |  |
| 7 | The system clearly indicated error messages and how to resolve them. |  |  |  |  |  |  |  |  |
| 8 | If I made a mistake using the system, I could recover from it easily and quickly. |  |  |  |  |  |  |  |  |
| 9 | The information provided by the system (e.g., online help, on-screen messages, documentation) was clear. |  |  |  |  |  |  |  |  |
| 10 | It was easy to find the information I needed in the system. |  |  |  |  |  |  |  |  |
| 11 | The information provided by the system helped me to complete my tasks. |  |  |  |  |  |  |  |  |
| 12 | The layout of the information on the screen was clear. |  |  |  |  |  |  |  |  |
| 13 | The system’s interface was intuitive to use. |  |  |  |  |  |  |  |  |
| 14 | I liked the system’s interface. |  |  |  |  |  |  |  |  |
| 15 | The system has all the functions and capabilities I expected. |  |  |  |  |  |  |  |  |
| 16 | I am overall satisfied with the system. |  |  |  |  |  |  |  |  |
